# Supplementary material for: LiCl treatment leads to long-term restoration of spine maturation and synaptogenesis in adult Tbr1 mutants
Source: PubMed Central journal article supplement (PMC8903688; doi:10.1186/s11689-022-09421-5), 2022-02-05

**Figure S1: LiCl Treatment Rescues Synaptic Deficit in SSCx of *Tbr1<sup>layer6</sup>* mutant mice.**

Immunofluorescence (IF) was used to detect excitatory (**A, C**) and inhibitory (**B, D**) synapses onto dendrites from SSCx of *Tbr1<sup>wildtype</sup>* (*Ntsr1-cre::tdTomato<sup>f/+</sup>*; blue), *Tbr1<sup>layer6</sup>* CKOs (*Tbr1<sup>fl/fl</sup>::Ntsr1-cre::tdTomato<sup>f/+</sup>*; red) (n=10 dendrites). Synapses were measured (i) 24 hrs and (ii) 4 weeks after injection with saline or LiCl at P180.

Excitatory synapses were analyzed by VGlut1<sup>+</sup> boutons and PSD95<sup>+</sup> clusters co-localizing onto the dendrites from layer 6 neurons of SSCx of *Tbr1<sup>wildtype</sup>* (red) and *Tbr1<sup>layer6CKO</sup>* (blue) mice 24 hrs (at P181; A) and 4 weeks (P208; C) after saline and/or LiCl was administered. *Mann-Whitney* \*\*\*\*p < 0.0001, ns = not significant.

Inhibitory synaptic density was measured by VGat<sup>+</sup> boutons and Gephyrin<sup>+</sup> clusters co-localizing onto dendrites of SSCx of *Tbr1<sup>wildtype</sup>* (red) and *Tbr1<sup>layer6CKO</sup>* mice (blue), 24 hrs (at P181; B) and 4 weeks (P208; D) after saline and/or LiCl was administered. ImageJ software was used to process confocal images for quantification. Two-tailed T-test with *Mann-Whitney* correction was used for pairwise comparisons. *Mann-Whitney* \*\*\*\*p < 0.0001, ns = not significant.

i) *In vivo* Synapse Analysis at P181, 24hrs After LiCl Treatment

A) Excitatory Synapses in the SSCx of *Tbr1*<sup>layer6</sup> CKO

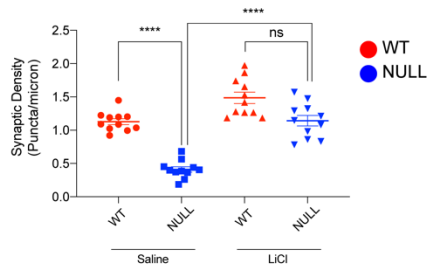

B) Inhibitory Synapses in the SSCx of *Tbr1*<sup>layer6</sup> CKO

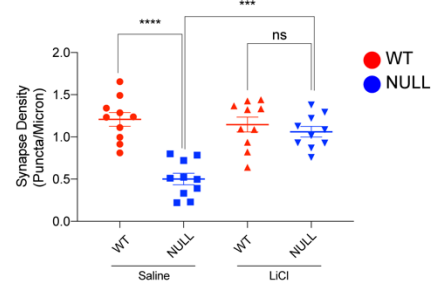

ii) *In vivo* Synapse Analysis at P208, After LiCl Treatment at P180

C) Excitatory Synapses in the SSCx of *Tbr1*<sup>layer6</sup> CKO

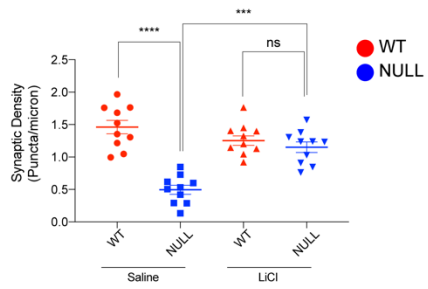

D) Inhibitory Synapses in the SSCx of *Tbr1*<sup>layer6</sup> CKO

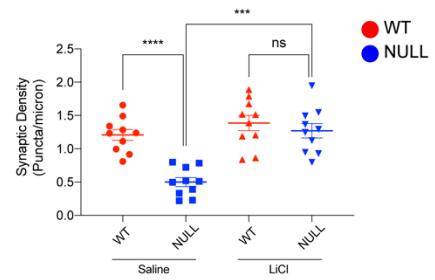

**Figure S2: LiCl Treatment Results in long-term Restoration of Synaptic Deficit in *Tbr1* Mutants.**

Immunofluorescence (IF) was used to detect excitatory **(i)** and inhibitory **(ii)** synapses onto dendrites from mPFCx of *Tbr1*<sup>wildtype</sup> (*Rbp4-cre::tdTomato*<sup>f/+</sup>; green), *Tbr1*<sup>layer5</sup> CKOs (*Tbr1*<sup>fl/fl</sup>::*Rbp4-cre::tdTomato*<sup>f/+</sup>; orange) and dendrites from SSCx of *Tbr1*<sup>wildtype</sup> (*Ntsr1-cre::tdTomato*<sup>f/+</sup>; red), *Tbr1*<sup>layer6</sup> CKOs (*Tbr1*<sup>fl/fl</sup>::*Ntsr1-cre::tdTomato*<sup>f/+</sup>; blue) (n=10 dendrites). Synapses were measured 6 months after injection with saline or LiCl at P30.

**(i)** Excitatory synapses were analyzed by VGlut1<sup>+</sup> boutons and PSD95<sup>+</sup> clusters co-localizing onto the dendrites from (A) layer 5 neurons of mPFCx of *Tbr1*<sup>wildtype</sup> (green) and *Tbr1*<sup>layer5CKO</sup> (orange), (B) layer 6 neurons of SSCx of *Tbr1*<sup>wildtype</sup> (red) and *Tbr1*<sup>layer6CKO</sup> (blue) mice 6 months after saline and/or LiCl was administered. *Mann-Whitney* \*\*\*\*p < 0.0001, ns = not significant.

**(ii)** Inhibitory synaptic density was measured by VGat<sup>+</sup> boutons and Gephyrin<sup>+</sup> clusters co-localizing onto dendrites of (C) mPFCx of *Tbr1*<sup>wildtype</sup> (green) and *Tbr1*<sup>layer5CKO</sup> (orange) and (D) SSCx of *Tbr1*<sup>wildtype</sup> (red) and *Tbr1*<sup>layer6CKO</sup> mice (blue), 6 months after saline and/or LiCl was administered. Fiji ImageJ software was used to process confocal images for quantification. Two-tailed T-test with *Mann-Whitney* correction was used for pairwise comparisons. *Mann-Whitney* \*\*\*\*p < 0.0001, ns = not significant.

**i) *In vivo* Excitatory Synapse Analysis of *Tbr1* Conditional Mutant at P210, 6 months After LiCl Treatment**

**A) mPFCx of *Tbr1*<sup>layer5</sup> CKO**

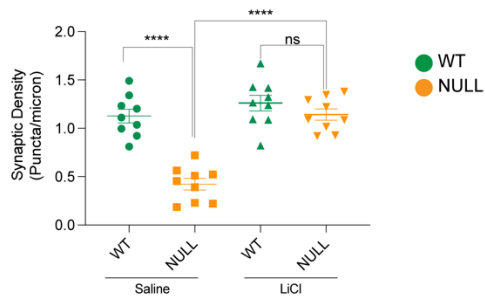

**B) SSCx of *Tbr1*<sup>layer6</sup> CKO**

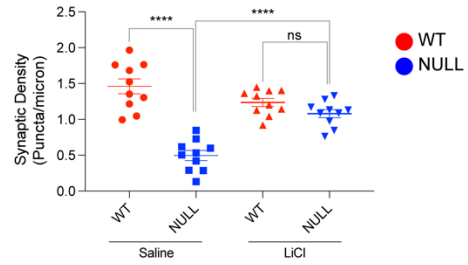

**ii) *In vivo* Inhibitory Synapse Analysis of *Tbr1* Conditional Mutant at P210, 6 months After LiCl Treatment**

**C) mPFCx of *Tbr1*<sup>layer5</sup> CKO**

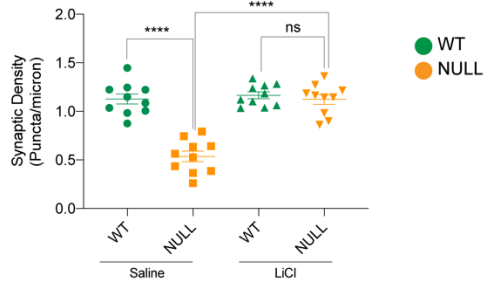

**D) SSCx of *Tbr1*<sup>layer6</sup> CKO**

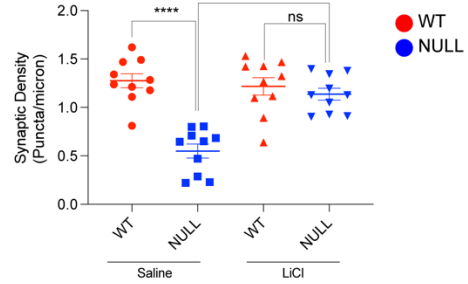

**Figure S3: LiCl Restores Dendritic Spine Density Deficit in SSCx of *Tbr1<sup>layer6</sup>* CKOs at P180.**

*Ntsr1-cre::tdTomato<sup>f/+</sup>* alleles was used to label the dendrites of layer 6 neurons (A-D). The monochrome tdTomato signal (white) is shown from apical dendrites of saline-injected (A, B) and LiCl injected (C, D) *Tbr1* CKOs at P181. Imaris software (v9.2.1) was used to analyze the dendritic spine density on apical dendrites of *Tbr1<sup>layer6</sup>* wildtype and *Tbr1<sup>layer6</sup>CKO* neurons located within layer 5 of SSCx (A-D). Changes in the dendritic spine density were examined at P181 (A-D), 24 hrs after LiCl treatment. (E) Quantification of mature dendritic spines on apical dendrites of *Tbr1<sup>layer6</sup>* wildtype and *Tbr1<sup>layer6</sup>CKO* neurons at P181, 24 hrs after injection with saline (control) or LiCl. Spine density was improved 24 hrs after LiCl treatment (D), compared to the saline-injected control animals (B). Two-tailed T-test with Tukey correction was used for pairwise comparisons. *Mann-Whitney* \*\*\*\* $p < 0.0001$  (n = 10 dendrites), ns = not significant. Scale bar = 2  $\mu$ m.

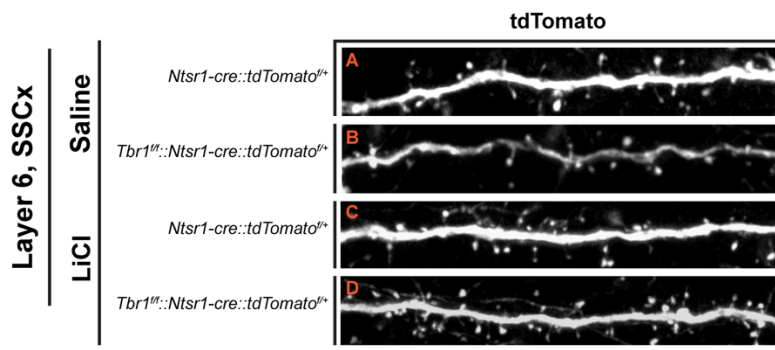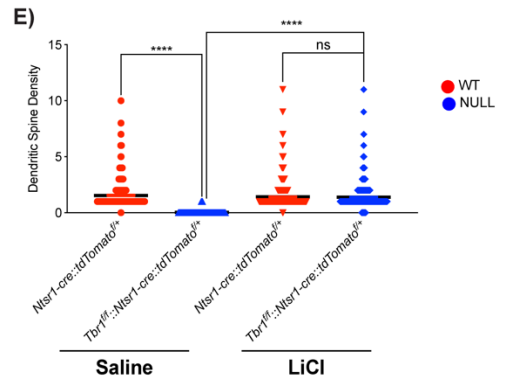

**Figure S4: A single LiCl dose restores excitatory synaptic function in SSCx of *Tbr1*<sup>layer6</sup> CKOs.**

(A) Representative traces of miniature excitatory postsynaptic currents (mEPSCs) from P58-95 *Tbr1*<sup>wildtype</sup> (black) and *Tbr1*<sup>layer6CKO</sup> (cyan) SSCx layer 6 neurons following saline administration. Scale bars: 20 pA, 100 ms. (B) Left: quantification of mEPSC frequency. *Mann-Whitney* \*\*\**p* = 0.0002 (*Tbr1*<sup>wildtype+saline</sup>:  $7.33 \pm 1.2$  Hz, *n* = 11, *Tbr1*<sup>layer6CKO+saline</sup>  $2.8 \pm 0.4$  Hz, *n* = 8). Right: cumulative probability distribution of mEPSC inter-event intervals. *Kolmogorov-Smirnov* \**p* = 0.016. (C) Left: quantification of mEPSC amplitude. *Mann-Whitney* \*\**p* = 0.001 (*Tbr1*<sup>wildtype</sup>:  $7.6 \pm 0.4$  pA, *n* = 11, *Tbr1*<sup>layer6CKO</sup>  $5.5 \pm 0.3$  pA, *n* = 8). Right: cumulative probability distribution of mEPSC amplitude. *Kolmogorov-Smirnov* *p* = 0.27. (D) Representative traces of mEPSCs from layer 6 SSCx neurons from P58-95 *Tbr1*<sup>wildtype</sup> (green) and *Tbr1*<sup>layer6CKO</sup> (purple) treated with 400 mg/kg LiCl at P30. Scale bars: 20 pA, 100 ms. (E) Left: quantification of mEPSC frequency. *Mann-Whitney* *p* = 0.1 (*Tbr1*<sup>wildtype+LiCl</sup>:  $4.1 \pm 1.0$  Hz, *n* = 11, *Tbr1*<sup>layer6CKO+LiCl</sup>  $4.4 \pm 0.5$  Hz, *n* = 14). Right: cumulative probability distribution of mEPSC inter-event intervals. *Kolmogorov-Smirnov* *p* = 0.7. (F) Left: quantification of mEPSC amplitude. *Mann-Whitney* *p* = 0.09 (*Tbr1*<sup>wildtype+LiCl</sup>:  $6.6 \pm 0.6$  pA, *n* = 11, *Tbr1*<sup>layer6CKO+LiCl</sup>  $7.5 \pm 0.3$  pA, *n* = 14). Right: cumulative probability distribution of mEPSC inter-event intervals. *Kolmogorov-Smirnov* *p* = 0.54. Boxplots are min to max show all points.

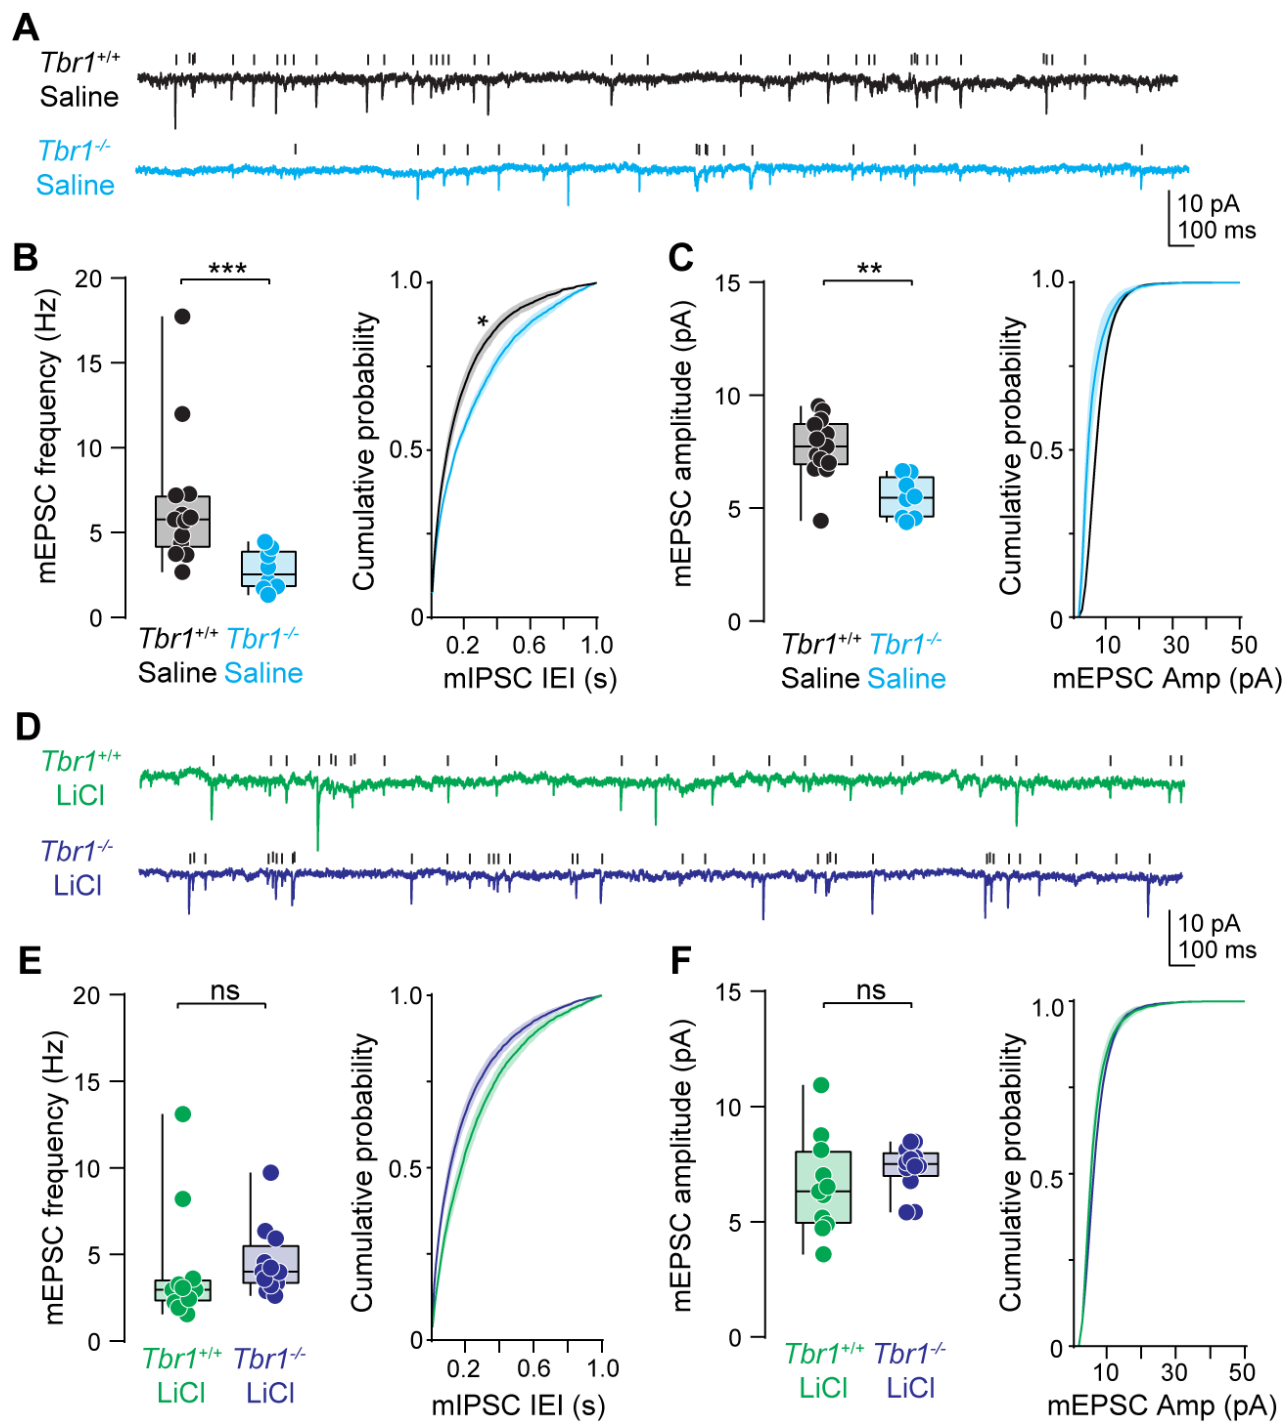



**Figure S5: LiCl treatment rescues inhibitory synaptic deficits in SSCx of *Tbr1*<sup>layer6</sup> CKOs.**

(A) Representative traces of miniature inhibitory postsynaptic currents (mIPSCs) from SSCx layer 6 pyramidal neurons from saline treated P58-95 *Tbr1*<sup>wildtype</sup> (black) and *Tbr1*<sup>layer6CKO</sup> (cyan) mice. Scale bars: 20 pA, 100 ms. (B) Left: quantification of mIPSC frequency from *Tbr1*<sup>wildtype</sup> (black) and *Tbr1*<sup>layer6CKO</sup> (cyan) neurons. *Mann-Whitney*  $p = 0.28$  (*Tbr1*<sup>wildtype+saline</sup>:  $14.8 \pm 3.8$  Hz,  $n = 9$ , *Tbr1*<sup>layer6CKO+saline</sup>  $8.7 \pm 2.4$  Hz,  $n = 8$ ). Right: cumulative probability distribution of mIPSC inter-event intervals. *Kolmogorov-Smirnov*  $*p = 0.01$ . (C) Left: quantification of mIPSC amplitude. *Mann-Whitney*  $p = 0.74$  (*Tbr1*<sup>wildtype+saline</sup>:  $12.2 \pm 1.3$  pA,  $n = 9$ , *Tbr1*<sup>layer6CKO+saline</sup>  $11.1 \pm 0.7$  pA,  $n = 8$ ). Right: cumulative probability distribution of mIPSC amplitude. *Kolmogorov-Smirnov*  $*p = 0.012$ . (D) Representative traces of mIPSCs from layer 6 SSCx neurons from LiCl (400 mg/kg) treated P58-95 *Tbr1*<sup>wildtype</sup> (green) and *Tbr1*<sup>layer6CKO</sup> (purple) mice. Scale bars: 20 pA, 100 ms. (E) Left: quantification of mIPSC frequency. *Mann-Whitney*  $p = 0.2$  (*Tbr1*<sup>wildtype+LiCl</sup>:  $9.5 \pm 2.6$  Hz,  $n = 8$ , *Tbr1*<sup>layer6CKO+LiCl</sup>  $12.8 \pm 3.1$  Hz,  $n = 9$ ). Right: cumulative probability distribution of mIPSC inter-event intervals. *Kolmogorov-Smirnov*  $*p = 0.01$ . (F) Left: quantification of mIPSC amplitude. *Mann-Whitney*  $p = 0.96$  (*Tbr1*<sup>wildtype+LiCl</sup>:  $12.3 \pm 0.6$  pA,  $n = 8$ , *Tbr1*<sup>layer6CKO+LiCl</sup>  $12.6 \pm 0.6$  pA,  $n = 9$ ). Right: cumulative probability distribution of mIPSC inter-event intervals. *Kolmogorov-Smirnov*  $p = 0.99$ . Boxplots are min to max show all points.

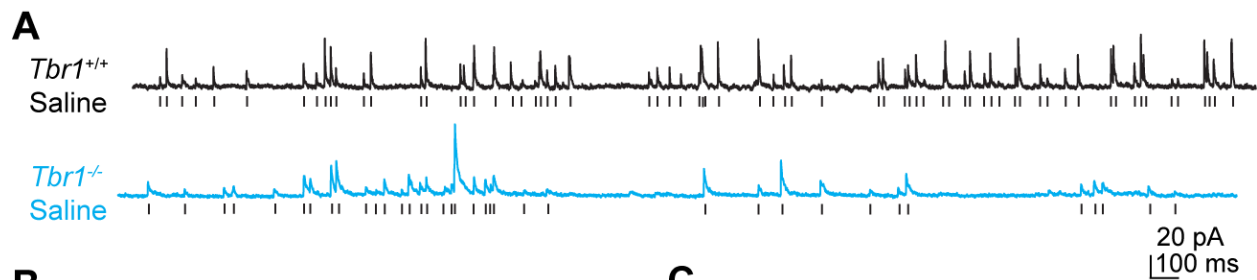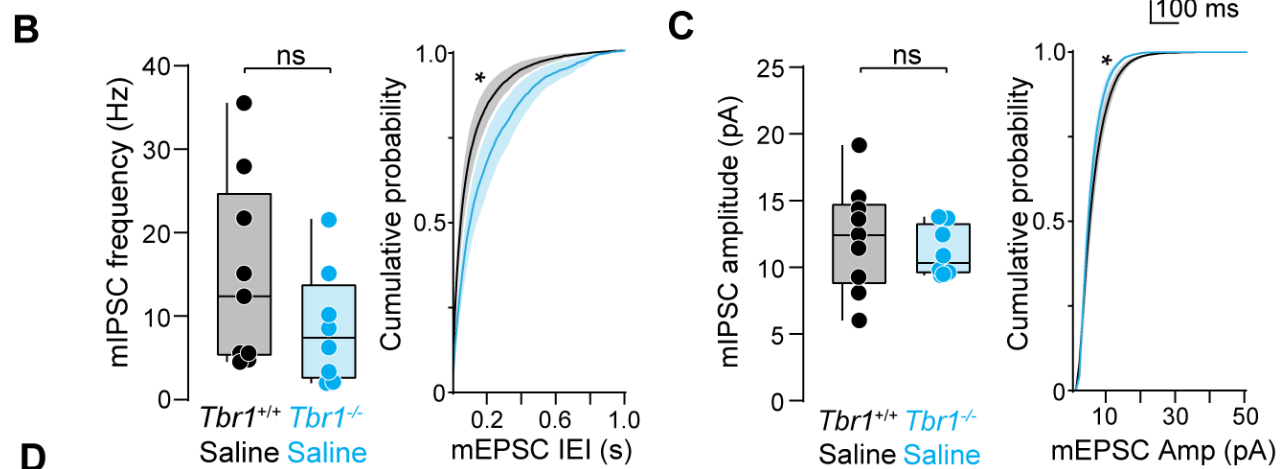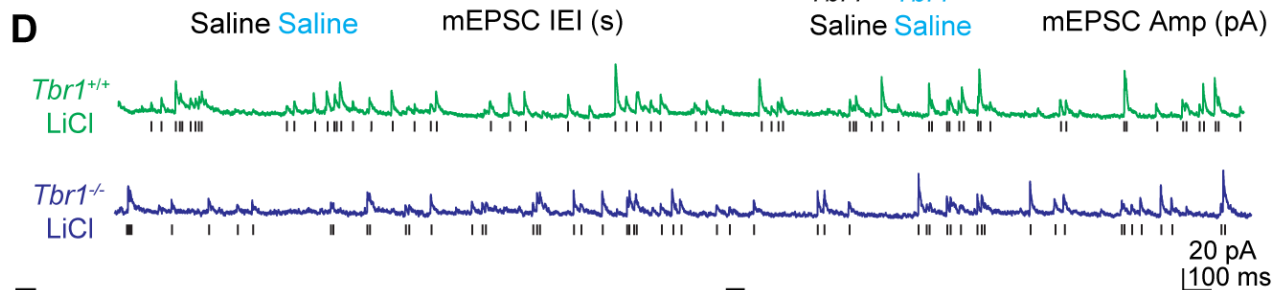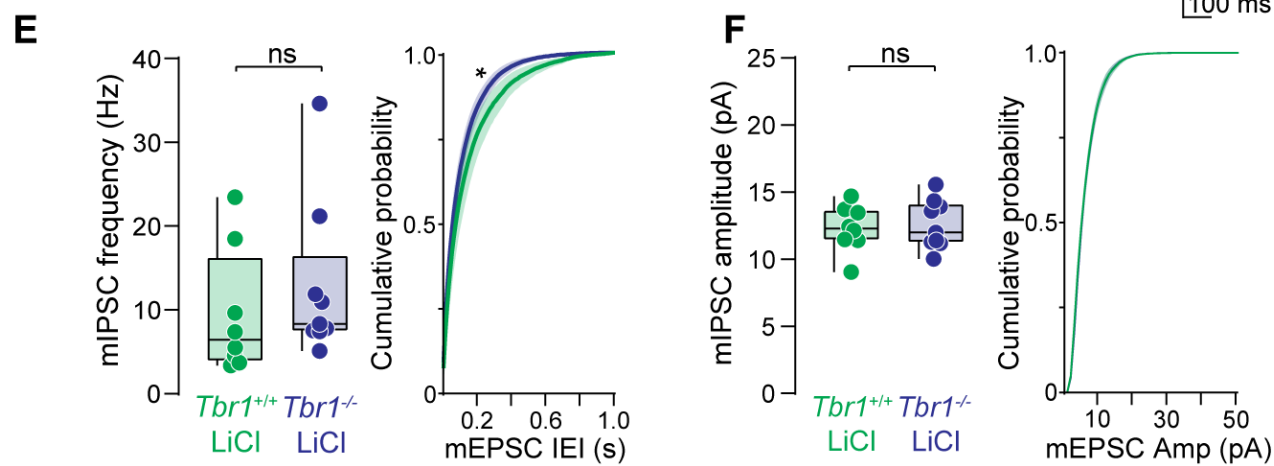

Supplement: 11689_2022_9421_MOESM1_ESM.pdf [file 11689_2022_9421_MOESM1_ESM.pdf]
